# Supplementary material for: Yolk–shell structured Au@Ag@mSiO2 as a probe for sensing cysteine enantiomers and Cu2+ based on circular dichroism
Source: Royal Society of Chemistry journal article supplement (doi:10.1039/c9an01541h), 2019-01-01
Supplement: c9an01541h1.pdf [file c9an01541h1.pdf]

## Supporting Information

Yolk–shell structured Au@Ag@mSiO<sub>2</sub> as probe  
for sensing of cysteine enantiomers and Cu<sup>2+</sup>  
based on circular dichroism

Jing Wang, Xu Xu, Xiaolin Qiu, Shuaishuai Zhang and Yinxian Peng

School of Environmental and Chemical Engineering, Jiangsu University of Science and  
Technology, Zhenjiang 212003, China

## Table of Contents

- S1** UV-Vis absorption spectra of the Au@Ag@mSiO<sub>2</sub> and YS-Au@Ag@mSiO<sub>2</sub>.
- S2** CD spectra of the pure L/D-Cys solutions.
- S3** CD spectra of the Au@Ag@mSiO<sub>2</sub>-L-Cys and YS-Au@Ag@mSiO<sub>2</sub>-L-Cys.
- S4** (a) CD spectra of the YS-Au@Ag@mSiO<sub>2</sub> responded to different concentration of D-Cys. D-Cys molecules reached saturated adsorption on the surface Au@Ag when the concentration of L-Cys was ~90 μM. (b) Linear relationship between the CD intensity (258 nm) and concentration of D-Cys.
- S5** CD spectra of the YS-Au@Ag@mSiO<sub>2</sub> with different composition of L-Cys.
- S6** UV-Vis absorption spectra of the YS-Au@Ag@mSiO<sub>2</sub> responded to different concentration of Cu<sup>2+</sup> (1, 5, 10, 25, 50, 100 and 250 nM, respectively).
- S7** The evolutions of CD spectra of the YS-Au@Ag@mSiO<sub>2</sub> in the presence of various metal ions.

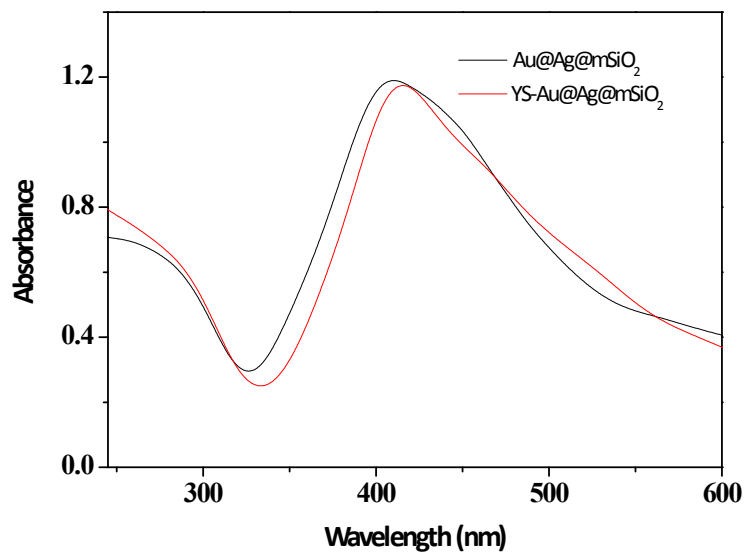

**Figure S1** UV-Vis absorption spectra of the Au@Ag@mSiO<sub>2</sub> and YS-Au@Ag@mSiO<sub>2</sub>.

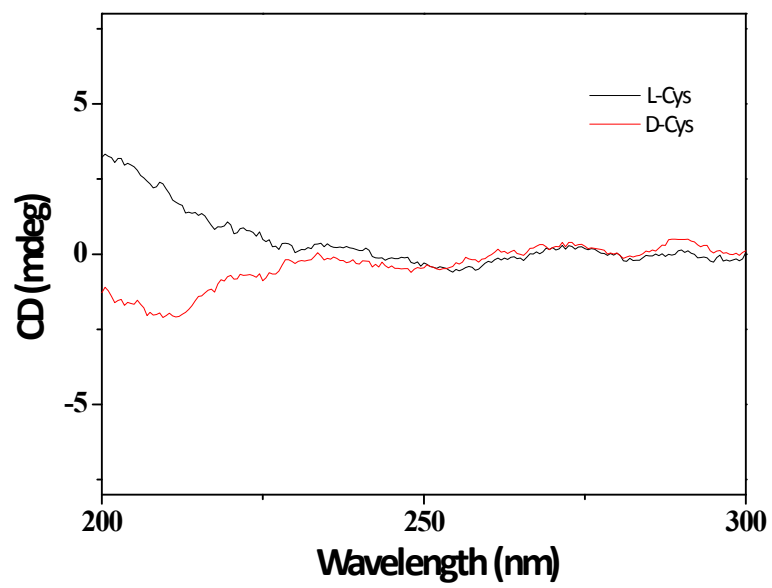

**Figure S2** CD spectra of the pure L/D-Cys solutions.

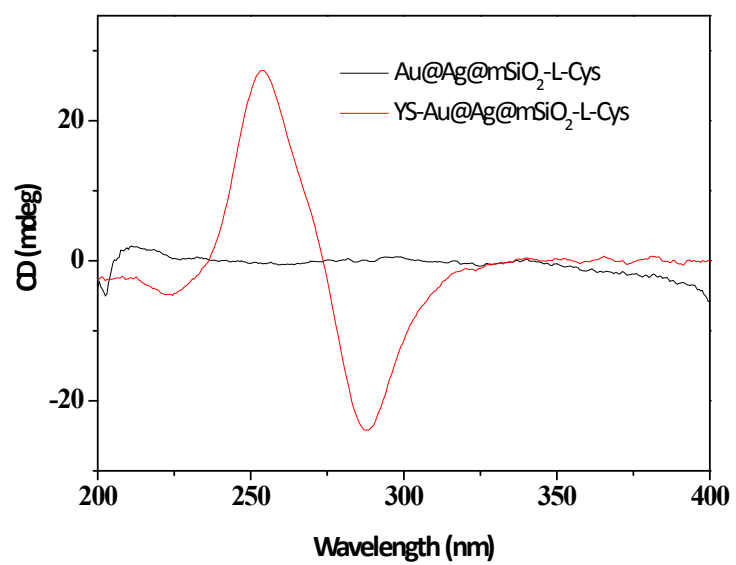

**Figure S3** CD spectra of the Au@Ag@mSiO<sub>2</sub>-L-Cys and YS-Au@Ag@mSiO<sub>2</sub>-L-Cys.

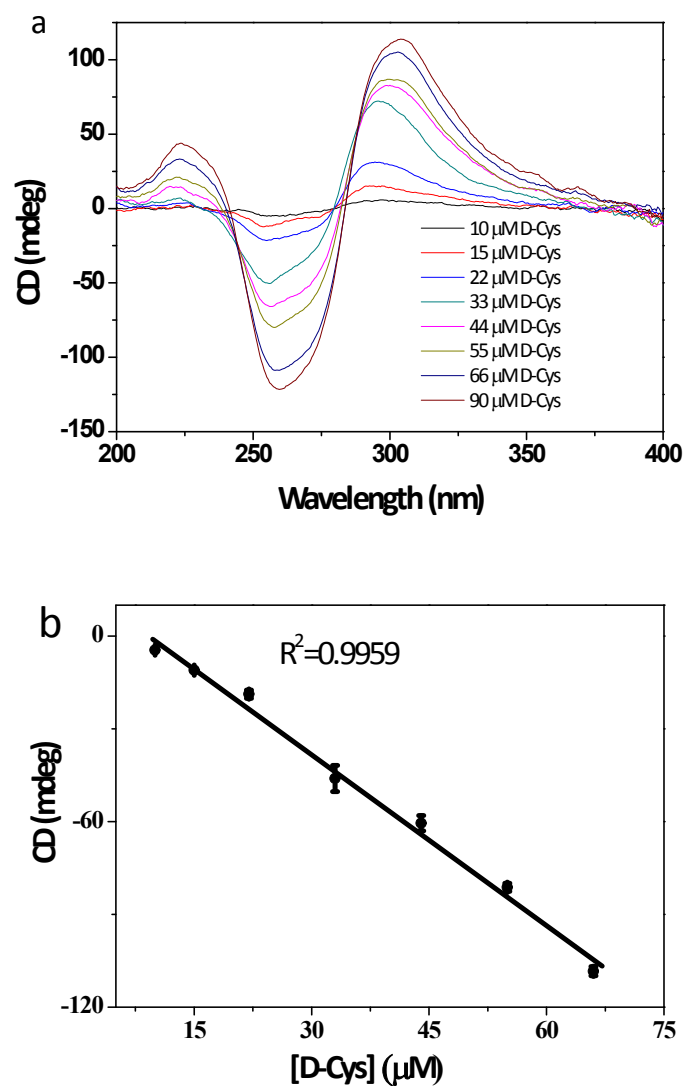

**Figure S4** (a) CD spectra of the YS-Au@Ag@mSiO<sub>2</sub> responded to different concentration of D-Cys. D-Cys molecules reached saturated adsorption on the surface Au@Ag when the concentration of L-Cys was  $\sim$ 90  $\mu$ M. (b) Linear relationship between the CD intensity (258 nm) and concentration of D-Cys.

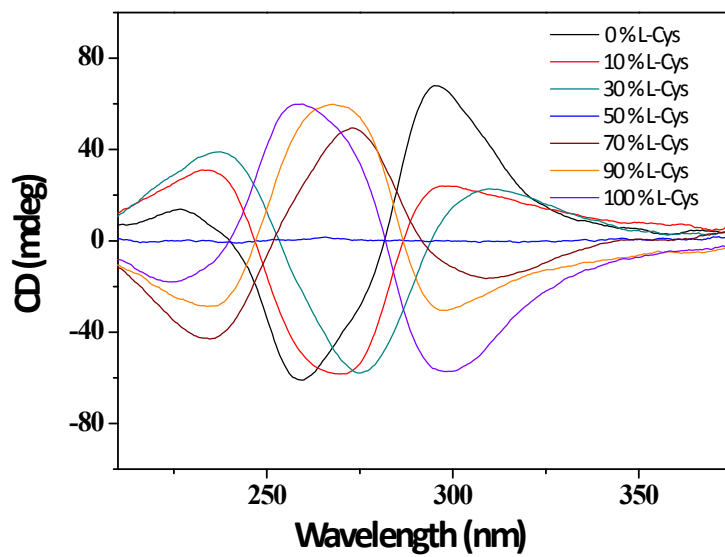

Figure S5 CD spectra of the YS-Au@Ag@mSiO<sub>2</sub> with different composition of L-Cys.

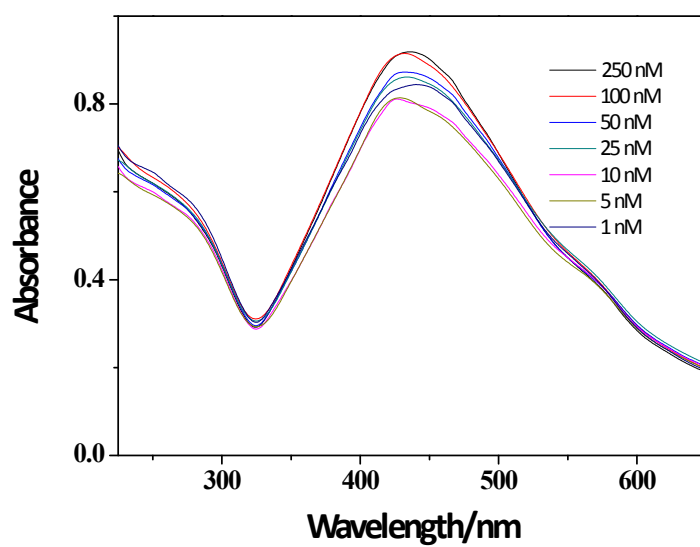

**Figure S6** UV-Vis absorption spectra of the YS-Au@Ag@mSiO<sub>2</sub> responded to different concentration of Cu<sup>2+</sup> (1, 5, 10, 25, 50, 100 and 250 nM, respectively).



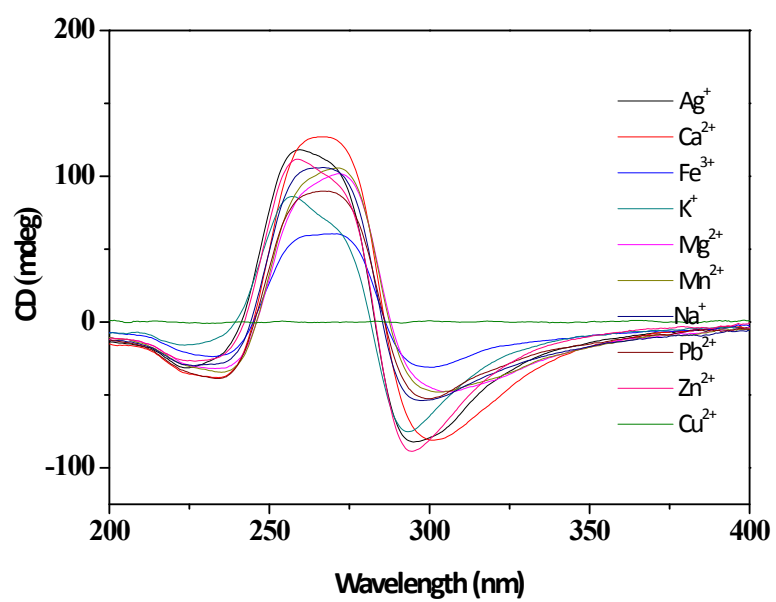

**Figure S7** The evolutions of CD spectra of the YS-Au@Ag@mSiO<sub>2</sub> in the presence of various metal ions.
